# Supplementary material for: SARS-CoV-2 screening among people living in homeless shelters in Brussels, Belgium
Source: PubMed Central journal article supplement (PMC8205130; doi:10.1371/journal.pone.0252886), 2021-06-15
Supplement: pone.0252886.s001.pdf [file pone.0252886.s001.pdf]

**S1 Fig: Survey COVID19 Kobo Collect Form**

**Person's identity****Last Name** \***First name** \***Porte d'Ulysse number****Anonymous patient**

- Yes  
 No

**Is the person a staff member or a resident?**

- Resident  
 Staff member

**Gender** \*

- Male  
 Female  
 Other  
 Unknown

**Date of birth**

yyyy-mm-dd

**Access to care**

- UMA/medical card  
 Health insurance  
 Fedasil  
 European Health Insurance Card  
 None  
 Doesn't know

**Screening**

|                                                                                                                                                                                                                                                                                                                                                                                                                                                                                                                                                                                                                                                                                                                                                                                                                                                                                                                                                                                                                                                                                                                                                                                                                                                                                                                                                                                                                                                                                                                                                                                                                                                                                                                                                                                                                                                                                                                                                                                                                                                                                                                                                 |                                                                               |                                                      |                                          |                                       |                                              |                                     |                                      |                                     |                                     |                                  |                                          |                                                         |                                                |                                   |                                                    |                                                   |                                                       |                                                           |                                     |                                        |                                         |                                 |                                 |                                            |                                        |                                |                              |                                                      |                                        |                                                 |                                             |                               |                                   |                                   |                                   |                              |                               |                                          |                                      |  |
|-------------------------------------------------------------------------------------------------------------------------------------------------------------------------------------------------------------------------------------------------------------------------------------------------------------------------------------------------------------------------------------------------------------------------------------------------------------------------------------------------------------------------------------------------------------------------------------------------------------------------------------------------------------------------------------------------------------------------------------------------------------------------------------------------------------------------------------------------------------------------------------------------------------------------------------------------------------------------------------------------------------------------------------------------------------------------------------------------------------------------------------------------------------------------------------------------------------------------------------------------------------------------------------------------------------------------------------------------------------------------------------------------------------------------------------------------------------------------------------------------------------------------------------------------------------------------------------------------------------------------------------------------------------------------------------------------------------------------------------------------------------------------------------------------------------------------------------------------------------------------------------------------------------------------------------------------------------------------------------------------------------------------------------------------------------------------------------------------------------------------------------------------|-------------------------------------------------------------------------------|------------------------------------------------------|------------------------------------------|---------------------------------------|----------------------------------------------|-------------------------------------|--------------------------------------|-------------------------------------|-------------------------------------|----------------------------------|------------------------------------------|---------------------------------------------------------|------------------------------------------------|-----------------------------------|----------------------------------------------------|---------------------------------------------------|-------------------------------------------------------|-----------------------------------------------------------|-------------------------------------|----------------------------------------|-----------------------------------------|---------------------------------|---------------------------------|--------------------------------------------|----------------------------------------|--------------------------------|------------------------------|------------------------------------------------------|----------------------------------------|-------------------------------------------------|---------------------------------------------|-------------------------------|-----------------------------------|-----------------------------------|-----------------------------------|------------------------------|-------------------------------|------------------------------------------|--------------------------------------|--|
| <p><b>Do you agree to be tested?</b></p> <p><input type="radio"/></p> <p><input type="radio"/></p> <p>Yes No</p>                                                                                                                                                                                                                                                                                                                                                                                                                                                                                                                                                                                                                                                                                                                                                                                                                                                                                                                                                                                                                                                                                                                                                                                                                                                                                                                                                                                                                                                                                                                                                                                                                                                                                                                                                                                                                                                                                                                                                                                                                                |                                                                               |                                                      |                                          |                                       |                                              |                                     |                                      |                                     |                                     |                                  |                                          |                                                         |                                                |                                   |                                                    |                                                   |                                                       |                                                           |                                     |                                        |                                         |                                 |                                 |                                            |                                        |                                |                              |                                                      |                                        |                                                 |                                             |                               |                                   |                                   |                                   |                              |                               |                                          |                                      |  |
| <p><b>Date of screening</b> *</p> <p>yyyy-mm-dd</p> <p>.....</p>                                                                                                                                                                                                                                                                                                                                                                                                                                                                                                                                                                                                                                                                                                                                                                                                                                                                                                                                                                                                                                                                                                                                                                                                                                                                                                                                                                                                                                                                                                                                                                                                                                                                                                                                                                                                                                                                                                                                                                                                                                                                                |                                                                               |                                                      |                                          |                                       |                                              |                                     |                                      |                                     |                                     |                                  |                                          |                                                         |                                                |                                   |                                                    |                                                   |                                                       |                                                           |                                     |                                        |                                         |                                 |                                 |                                            |                                        |                                |                              |                                                      |                                        |                                                 |                                             |                               |                                   |                                   |                                   |                              |                               |                                          |                                      |  |
| <p><b>Place of screening</b> *</p> <table border="0"> <tr> <td><input type="radio"/> Accueil Montfort</td> <td><input type="radio"/> Auberge DoucheFLUX</td> <td><input type="radio"/> Belgium Kitchen</td> </tr> <tr> <td><input type="radio"/> Belgium Kitchen Volxem</td> <td><input type="radio"/> Centre Ariane</td> <td><input type="radio"/> Centre Raphaël</td> </tr> <tr> <td><input type="radio"/> Chèvrefeuille</td> <td><input type="radio"/> Georges Motte</td> <td><input type="radio"/> Home 18-24</td> </tr> <tr> <td><input type="radio"/> Home Victor du Pré</td> <td><input type="radio"/> Hôtel de Bruxelles (Saint-Gilles)</td> <td><input type="radio"/> Hôtel Fierlandt (Forest)</td> </tr> <tr> <td><input type="radio"/> Hôtel Maria</td> <td><input type="radio"/> Hôtel Président (Samusocial)</td> <td><input type="radio"/> Hotel Sabina (Saint-Gilles)</td> </tr> <tr> <td><input type="radio"/> Hotel X Place St Denis (Forest)</td> <td><input type="radio"/> La Maison de la Mère et de l'Enfant</td> <td><input type="radio"/> La Parenthèse</td> </tr> <tr> <td><input type="radio"/> La Porte Ouverte</td> <td><input type="radio"/> Le Chant d'Oiseau</td> <td><input type="radio"/> Le Refuge</td> </tr> <tr> <td><input type="radio"/> Le Relais</td> <td><input type="radio"/> Les Foyers d'Accueil</td> <td><input type="radio"/> Les Petits Riens</td> </tr> <tr> <td><input type="radio"/> L'escale</td> <td><input type="radio"/> L'Ilôt</td> <td><input type="radio"/> L'Ilôt (Chaussée de Charleroi)</td> </tr> <tr> <td><input type="radio"/> Maison Rue Verte</td> <td><input type="radio"/> Molenbeek Vanderstichelen</td> <td><input type="radio"/> New Samusocial/Woluwé</td> </tr> <tr> <td><input type="radio"/> Pag-Asa</td> <td><input type="radio"/> Poverello 1</td> <td><input type="radio"/> Poverello 2</td> </tr> <tr> <td><input type="radio"/> Poverello 3</td> <td><input type="radio"/> Source</td> <td><input type="radio"/> Transit</td> </tr> <tr> <td><input type="radio"/> Trêves (Red Cross)</td> <td><input type="radio"/> Trois Pommiers</td> <td></td> </tr> </table> |                                                                               | <input type="radio"/> Accueil Montfort               | <input type="radio"/> Auberge DoucheFLUX | <input type="radio"/> Belgium Kitchen | <input type="radio"/> Belgium Kitchen Volxem | <input type="radio"/> Centre Ariane | <input type="radio"/> Centre Raphaël | <input type="radio"/> Chèvrefeuille | <input type="radio"/> Georges Motte | <input type="radio"/> Home 18-24 | <input type="radio"/> Home Victor du Pré | <input type="radio"/> Hôtel de Bruxelles (Saint-Gilles) | <input type="radio"/> Hôtel Fierlandt (Forest) | <input type="radio"/> Hôtel Maria | <input type="radio"/> Hôtel Président (Samusocial) | <input type="radio"/> Hotel Sabina (Saint-Gilles) | <input type="radio"/> Hotel X Place St Denis (Forest) | <input type="radio"/> La Maison de la Mère et de l'Enfant | <input type="radio"/> La Parenthèse | <input type="radio"/> La Porte Ouverte | <input type="radio"/> Le Chant d'Oiseau | <input type="radio"/> Le Refuge | <input type="radio"/> Le Relais | <input type="radio"/> Les Foyers d'Accueil | <input type="radio"/> Les Petits Riens | <input type="radio"/> L'escale | <input type="radio"/> L'Ilôt | <input type="radio"/> L'Ilôt (Chaussée de Charleroi) | <input type="radio"/> Maison Rue Verte | <input type="radio"/> Molenbeek Vanderstichelen | <input type="radio"/> New Samusocial/Woluwé | <input type="radio"/> Pag-Asa | <input type="radio"/> Poverello 1 | <input type="radio"/> Poverello 2 | <input type="radio"/> Poverello 3 | <input type="radio"/> Source | <input type="radio"/> Transit | <input type="radio"/> Trêves (Red Cross) | <input type="radio"/> Trois Pommiers |  |
| <input type="radio"/> Accueil Montfort                                                                                                                                                                                                                                                                                                                                                                                                                                                                                                                                                                                                                                                                                                                                                                                                                                                                                                                                                                                                                                                                                                                                                                                                                                                                                                                                                                                                                                                                                                                                                                                                                                                                                                                                                                                                                                                                                                                                                                                                                                                                                                          | <input type="radio"/> Auberge DoucheFLUX                                      | <input type="radio"/> Belgium Kitchen                |                                          |                                       |                                              |                                     |                                      |                                     |                                     |                                  |                                          |                                                         |                                                |                                   |                                                    |                                                   |                                                       |                                                           |                                     |                                        |                                         |                                 |                                 |                                            |                                        |                                |                              |                                                      |                                        |                                                 |                                             |                               |                                   |                                   |                                   |                              |                               |                                          |                                      |  |
| <input type="radio"/> Belgium Kitchen Volxem                                                                                                                                                                                                                                                                                                                                                                                                                                                                                                                                                                                                                                                                                                                                                                                                                                                                                                                                                                                                                                                                                                                                                                                                                                                                                                                                                                                                                                                                                                                                                                                                                                                                                                                                                                                                                                                                                                                                                                                                                                                                                                    | <input type="radio"/> Centre Ariane                                           | <input type="radio"/> Centre Raphaël                 |                                          |                                       |                                              |                                     |                                      |                                     |                                     |                                  |                                          |                                                         |                                                |                                   |                                                    |                                                   |                                                       |                                                           |                                     |                                        |                                         |                                 |                                 |                                            |                                        |                                |                              |                                                      |                                        |                                                 |                                             |                               |                                   |                                   |                                   |                              |                               |                                          |                                      |  |
| <input type="radio"/> Chèvrefeuille                                                                                                                                                                                                                                                                                                                                                                                                                                                                                                                                                                                                                                                                                                                                                                                                                                                                                                                                                                                                                                                                                                                                                                                                                                                                                                                                                                                                                                                                                                                                                                                                                                                                                                                                                                                                                                                                                                                                                                                                                                                                                                             | <input type="radio"/> Georges Motte                                           | <input type="radio"/> Home 18-24                     |                                          |                                       |                                              |                                     |                                      |                                     |                                     |                                  |                                          |                                                         |                                                |                                   |                                                    |                                                   |                                                       |                                                           |                                     |                                        |                                         |                                 |                                 |                                            |                                        |                                |                              |                                                      |                                        |                                                 |                                             |                               |                                   |                                   |                                   |                              |                               |                                          |                                      |  |
| <input type="radio"/> Home Victor du Pré                                                                                                                                                                                                                                                                                                                                                                                                                                                                                                                                                                                                                                                                                                                                                                                                                                                                                                                                                                                                                                                                                                                                                                                                                                                                                                                                                                                                                                                                                                                                                                                                                                                                                                                                                                                                                                                                                                                                                                                                                                                                                                        | <input type="radio"/> Hôtel de Bruxelles (Saint-Gilles)                       | <input type="radio"/> Hôtel Fierlandt (Forest)       |                                          |                                       |                                              |                                     |                                      |                                     |                                     |                                  |                                          |                                                         |                                                |                                   |                                                    |                                                   |                                                       |                                                           |                                     |                                        |                                         |                                 |                                 |                                            |                                        |                                |                              |                                                      |                                        |                                                 |                                             |                               |                                   |                                   |                                   |                              |                               |                                          |                                      |  |
| <input type="radio"/> Hôtel Maria                                                                                                                                                                                                                                                                                                                                                                                                                                                                                                                                                                                                                                                                                                                                                                                                                                                                                                                                                                                                                                                                                                                                                                                                                                                                                                                                                                                                                                                                                                                                                                                                                                                                                                                                                                                                                                                                                                                                                                                                                                                                                                               | <input type="radio"/> Hôtel Président (Samusocial)                            | <input type="radio"/> Hotel Sabina (Saint-Gilles)    |                                          |                                       |                                              |                                     |                                      |                                     |                                     |                                  |                                          |                                                         |                                                |                                   |                                                    |                                                   |                                                       |                                                           |                                     |                                        |                                         |                                 |                                 |                                            |                                        |                                |                              |                                                      |                                        |                                                 |                                             |                               |                                   |                                   |                                   |                              |                               |                                          |                                      |  |
| <input type="radio"/> Hotel X Place St Denis (Forest)                                                                                                                                                                                                                                                                                                                                                                                                                                                                                                                                                                                                                                                                                                                                                                                                                                                                                                                                                                                                                                                                                                                                                                                                                                                                                                                                                                                                                                                                                                                                                                                                                                                                                                                                                                                                                                                                                                                                                                                                                                                                                           | <input type="radio"/> La Maison de la Mère et de l'Enfant                     | <input type="radio"/> La Parenthèse                  |                                          |                                       |                                              |                                     |                                      |                                     |                                     |                                  |                                          |                                                         |                                                |                                   |                                                    |                                                   |                                                       |                                                           |                                     |                                        |                                         |                                 |                                 |                                            |                                        |                                |                              |                                                      |                                        |                                                 |                                             |                               |                                   |                                   |                                   |                              |                               |                                          |                                      |  |
| <input type="radio"/> La Porte Ouverte                                                                                                                                                                                                                                                                                                                                                                                                                                                                                                                                                                                                                                                                                                                                                                                                                                                                                                                                                                                                                                                                                                                                                                                                                                                                                                                                                                                                                                                                                                                                                                                                                                                                                                                                                                                                                                                                                                                                                                                                                                                                                                          | <input type="radio"/> Le Chant d'Oiseau                                       | <input type="radio"/> Le Refuge                      |                                          |                                       |                                              |                                     |                                      |                                     |                                     |                                  |                                          |                                                         |                                                |                                   |                                                    |                                                   |                                                       |                                                           |                                     |                                        |                                         |                                 |                                 |                                            |                                        |                                |                              |                                                      |                                        |                                                 |                                             |                               |                                   |                                   |                                   |                              |                               |                                          |                                      |  |
| <input type="radio"/> Le Relais                                                                                                                                                                                                                                                                                                                                                                                                                                                                                                                                                                                                                                                                                                                                                                                                                                                                                                                                                                                                                                                                                                                                                                                                                                                                                                                                                                                                                                                                                                                                                                                                                                                                                                                                                                                                                                                                                                                                                                                                                                                                                                                 | <input type="radio"/> Les Foyers d'Accueil                                    | <input type="radio"/> Les Petits Riens               |                                          |                                       |                                              |                                     |                                      |                                     |                                     |                                  |                                          |                                                         |                                                |                                   |                                                    |                                                   |                                                       |                                                           |                                     |                                        |                                         |                                 |                                 |                                            |                                        |                                |                              |                                                      |                                        |                                                 |                                             |                               |                                   |                                   |                                   |                              |                               |                                          |                                      |  |
| <input type="radio"/> L'escale                                                                                                                                                                                                                                                                                                                                                                                                                                                                                                                                                                                                                                                                                                                                                                                                                                                                                                                                                                                                                                                                                                                                                                                                                                                                                                                                                                                                                                                                                                                                                                                                                                                                                                                                                                                                                                                                                                                                                                                                                                                                                                                  | <input type="radio"/> L'Ilôt                                                  | <input type="radio"/> L'Ilôt (Chaussée de Charleroi) |                                          |                                       |                                              |                                     |                                      |                                     |                                     |                                  |                                          |                                                         |                                                |                                   |                                                    |                                                   |                                                       |                                                           |                                     |                                        |                                         |                                 |                                 |                                            |                                        |                                |                              |                                                      |                                        |                                                 |                                             |                               |                                   |                                   |                                   |                              |                               |                                          |                                      |  |
| <input type="radio"/> Maison Rue Verte                                                                                                                                                                                                                                                                                                                                                                                                                                                                                                                                                                                                                                                                                                                                                                                                                                                                                                                                                                                                                                                                                                                                                                                                                                                                                                                                                                                                                                                                                                                                                                                                                                                                                                                                                                                                                                                                                                                                                                                                                                                                                                          | <input type="radio"/> Molenbeek Vanderstichelen                               | <input type="radio"/> New Samusocial/Woluwé          |                                          |                                       |                                              |                                     |                                      |                                     |                                     |                                  |                                          |                                                         |                                                |                                   |                                                    |                                                   |                                                       |                                                           |                                     |                                        |                                         |                                 |                                 |                                            |                                        |                                |                              |                                                      |                                        |                                                 |                                             |                               |                                   |                                   |                                   |                              |                               |                                          |                                      |  |
| <input type="radio"/> Pag-Asa                                                                                                                                                                                                                                                                                                                                                                                                                                                                                                                                                                                                                                                                                                                                                                                                                                                                                                                                                                                                                                                                                                                                                                                                                                                                                                                                                                                                                                                                                                                                                                                                                                                                                                                                                                                                                                                                                                                                                                                                                                                                                                                   | <input type="radio"/> Poverello 1                                             | <input type="radio"/> Poverello 2                    |                                          |                                       |                                              |                                     |                                      |                                     |                                     |                                  |                                          |                                                         |                                                |                                   |                                                    |                                                   |                                                       |                                                           |                                     |                                        |                                         |                                 |                                 |                                            |                                        |                                |                              |                                                      |                                        |                                                 |                                             |                               |                                   |                                   |                                   |                              |                               |                                          |                                      |  |
| <input type="radio"/> Poverello 3                                                                                                                                                                                                                                                                                                                                                                                                                                                                                                                                                                                                                                                                                                                                                                                                                                                                                                                                                                                                                                                                                                                                                                                                                                                                                                                                                                                                                                                                                                                                                                                                                                                                                                                                                                                                                                                                                                                                                                                                                                                                                                               | <input type="radio"/> Source                                                  | <input type="radio"/> Transit                        |                                          |                                       |                                              |                                     |                                      |                                     |                                     |                                  |                                          |                                                         |                                                |                                   |                                                    |                                                   |                                                       |                                                           |                                     |                                        |                                         |                                 |                                 |                                            |                                        |                                |                              |                                                      |                                        |                                                 |                                             |                               |                                   |                                   |                                   |                              |                               |                                          |                                      |  |
| <input type="radio"/> Trêves (Red Cross)                                                                                                                                                                                                                                                                                                                                                                                                                                                                                                                                                                                                                                                                                                                                                                                                                                                                                                                                                                                                                                                                                                                                                                                                                                                                                                                                                                                                                                                                                                                                                                                                                                                                                                                                                                                                                                                                                                                                                                                                                                                                                                        | <input type="radio"/> Trois Pommiers                                          |                                                      |                                          |                                       |                                              |                                     |                                      |                                     |                                     |                                  |                                          |                                                         |                                                |                                   |                                                    |                                                   |                                                       |                                                           |                                     |                                        |                                         |                                 |                                 |                                            |                                        |                                |                              |                                                      |                                        |                                                 |                                             |                               |                                   |                                   |                                   |                              |                               |                                          |                                      |  |
| <p><b>Clinical evaluation</b></p> <p>.....</p>                                                                                                                                                                                                                                                                                                                                                                                                                                                                                                                                                                                                                                                                                                                                                                                                                                                                                                                                                                                                                                                                                                                                                                                                                                                                                                                                                                                                                                                                                                                                                                                                                                                                                                                                                                                                                                                                                                                                                                                                                                                                                                  | <p><b>Have you recently developed any of these symptoms?</b></p> <p>.....</p> |                                                      |                                          |                                       |                                              |                                     |                                      |                                     |                                     |                                  |                                          |                                                         |                                                |                                   |                                                    |                                                   |                                                       |                                                           |                                     |                                        |                                         |                                 |                                 |                                            |                                        |                                |                              |                                                      |                                        |                                                 |                                             |                               |                                   |                                   |                                   |                              |                               |                                          |                                      |  |
| <p><b>Cough, dyspnea, chest pain</b></p> <p>.....</p>                                                                                                                                                                                                                                                                                                                                                                                                                                                                                                                                                                                                                                                                                                                                                                                                                                                                                                                                                                                                                                                                                                                                                                                                                                                                                                                                                                                                                                                                                                                                                                                                                                                                                                                                                                                                                                                                                                                                                                                                                                                                                           | <p><input type="radio"/> Yes <input type="radio"/> No</p>                     |                                                      |                                          |                                       |                                              |                                     |                                      |                                     |                                     |                                  |                                          |                                                         |                                                |                                   |                                                    |                                                   |                                                       |                                                           |                                     |                                        |                                         |                                 |                                 |                                            |                                        |                                |                              |                                                      |                                        |                                                 |                                             |                               |                                   |                                   |                                   |                              |                               |                                          |                                      |  |

|                                                                                     |                                                    |
|-------------------------------------------------------------------------------------|----------------------------------------------------|
| <b>Anosmia (loss of sense of smell),<br/>dysgeusia<br/>(taste problem)</b><br>..... | <input type="radio"/> Yes <input type="radio"/> No |
| <b>Fever</b><br>.....                                                               | <input type="radio"/> Yes <input type="radio"/> No |
| <b>Muscle pains</b><br>.....                                                        | <input type="radio"/> Yes <input type="radio"/> No |

|                                                             |                                                    |
|-------------------------------------------------------------|----------------------------------------------------|
| <b>Fatigue</b><br>.....                                     | <input type="radio"/> Yes <input type="radio"/> No |
| <b>Rhinitis</b><br>.....                                    | <input type="radio"/> Yes <input type="radio"/> No |
| <b>Sore throat</b><br>.....                                 | <input type="radio"/> Yes <input type="radio"/> No |
| <b>Headaches</b><br>.....                                   | <input type="radio"/> Yes <input type="radio"/> No |
| <b>Anorexia</b><br>.....                                    | <input type="radio"/> Yes <input type="radio"/> No |
| <b>Aqueous diarrhea without apparent<br/>cause</b><br>..... | <input type="radio"/> Yes <input type="radio"/> No |

|                                                                                                                                                            |                                                    |
|------------------------------------------------------------------------------------------------------------------------------------------------------------|----------------------------------------------------|
| <b>Acute confusion</b><br>.....                                                                                                                            | <input type="radio"/> Yes <input type="radio"/> No |
| <b>Sudden fall without apparent cause</b><br>.....                                                                                                         | <input type="radio"/> Yes <input type="radio"/> No |
| <b>Are you suffering from a chronic respiratory disease (COPD, asthma,...)?</b><br><input type="radio"/><br><input type="radio"/><br>Y<br>e<br>s<br>N<br>o |                                                    |
| <b>Have the symptoms worsened?</b><br><input type="radio"/> Yes<br><input type="radio"/> No                                                                |                                                    |

**Have you shared a room with a person who has been tested positive to COVID19?**

- Yes
- No
- Doesn't know

**DO NOT MODIFY THIS CODE. WRITE THIS CODE ON THE CARD PROVIDED AND GIVE IT TO THE PERSON. ALSO GIVE THE CODE TO THE DOCTOR AND THE STAFF AT THE CENTRE.**

**The person's code is :**

**Results**

**TO BE COMPLETED AFTER RECEIPT OF RESULTS**

**Date of receipt of results**

yyyy-mm-dd

**Screening results**

- Positive
- Negative
- Invalid
